# Supplementary material for: Molecular Phylogenetic and Comparative Genomic Analysis of Pleurocordyceps fusiformispora sp. nov. and Perennicordyceps elaphomyceticola in the Family Polycephalomycetaceae
Source: MDPI journal article supplement (doi:10.3390/jof10040297), 2024-04-19
Supplement: s1 [file s1]

Supplementary materials for

# Molecular Phylogenetic and Comparative Genomic Analysis of *Pleurocordyceps fusiformispora* sp. nov. and *Perennicordyceps elaphomyceticola* in the Family Polycephalomycetaceae

Zuoheng Liu <sup>1,2,†</sup>, Yingling Lu <sup>1,2,†</sup>, Dexiang Tang <sup>1,2,†</sup>, Juye Zhu <sup>1,2</sup>, Lijun Luo <sup>1,2</sup>, Yue Chen <sup>1,2</sup> and Hong Yu <sup>1,2,\*</sup>

<sup>1</sup> Yunnan Herbal Laboratory, College of Ecology and Environmental Sciences, Yunnan University, Kunming 650504, China; lzh1313159@163.com (Z.L.); lylinglingua@163.com (Y.L.); tangdx1516@163.com (D.T.); zhujuye@mail.ynu.edu.cn (J.Z.); yunllj07@163.com (L.L.); cy106daytoy@163.com (Y.C.)

<sup>2</sup> The International Joint Research Center for Sustainable Utilization of Cordyceps Bioresources in China and Southeast Asia, Yunnan University, Kunming 650091, China

\* Correspondence: hongyu@ynu.edu.cn or herbfish@163.com; Tel.: +86-137-0067-6633

† These authors contributed equally to this work.

**Table S1.** Genomic assembly and functional annotation of *Pe. elaphomyceticola* and *Pl. fusiformispora* genome.

| Item              | Value                              |                       | Item      | Count                              |                       | Percentage (%)                     |                       |
|-------------------|------------------------------------|-----------------------|-----------|------------------------------------|-----------------------|------------------------------------|-----------------------|
|                   | <i>Pe.</i>                         | <i>Pl.</i>            |           | <i>Pe.</i>                         | <i>Pl.</i>            | <i>Pe.</i>                         | <i>Pl.</i>            |
|                   | <i>elaphomyceti</i><br><i>cola</i> | <i>fusiformispora</i> |           | <i>elaphomyceti</i><br><i>cola</i> | <i>fusiformispora</i> | <i>elaphomyce</i><br><i>ticola</i> | <i>fusiformispora</i> |
| Total length (Mb) | 31.51                              | 33.02                 | NR        | 7,536                              | 8,566                 | 96.6898                            | 97.2967               |
| Max length(bp)    | 592,654                            | 1,736,833             | SwissProt | 5,605                              | 6,412                 | 71.9143                            | 72.8305               |

|                          |            |            |        |       |       |         |         |
|--------------------------|------------|------------|--------|-------|-------|---------|---------|
| GC content (%)           | 48.79      | 50.08      | KEGG   | 3,509 | 3,723 | 45.0218 | 42.2876 |
| Total genes number       | 7,794      | 8,804      | GO     | 5,302 | 6,119 | 68.0267 | 69.5025 |
| Total genes length (bp)  | 12,410,008 | 14,320,079 | EggNOg | 7,196 | 8,183 | 92.3274 | 92.9464 |
| Average gene length (bp) | 1,592.2    | 1,626.5    | P450   | 7,622 | 8,618 | 97.7932 | 97.8873 |
| Gene Genome (%)          | 44.6288%   | 47.1169%   | TCDB   | 1,334 | 1,520 | 17.1157 | 17.2649 |
| Contigs                  | 747        | 164        |        |       |       |         |         |
| Scaffolds                | 708        | 137        |        |       |       |         |         |
| Contigs N50              | 131,715    | 755,432    |        |       |       |         |         |
| Scaffolds N50            | 137,010    | 799,650    |        |       |       |         |         |
| Contigs N90              | 18,131     | 194,277    |        |       |       |         |         |
| Scaffolds N90            | 18,940     | 220,879    |        |       |       |         |         |
| Complete BUSCOs (%)      | 96.8%      | 97.6%      |        |       |       |         |         |

**Table S2.** The biosynthesis gene cluster of putative secondary metabolites in two species of *Pe. elaphomceticola* and *Pl. fusiformispora*.

| Species                      | BGCs        | Location        | From   | To     | Domain          | Type | Most similar known cluster (%)   |
|------------------------------|-------------|-----------------|--------|--------|-----------------|------|----------------------------------|
| <i>Pe. elaphomy ceticola</i> | Region 7.1  | Scaffold 7.g25  | 74702  | 145697 | A-A-A-P         | NRPS | Unknown                          |
|                              |             |                 |        |        |                 |      | piperazine compound 1 piperazine |
|                              | Region 9.1  | Scaffold 9.g80  | 326610 | 364391 | A-P-Te          | NRPS | compound 2 (50%)                 |
|                              | Region 13.1 | Scaffold 13.g63 | 209865 | 243884 | A-P-T           | NRPS | ε-poly-lysine (100%)             |
|                              | Region 14.1 | Scaffold 14.g18 | 48607  | 93157  | C-A-P-C         | NRPS | Unknown                          |
|                              | Region 20.2 | Scaffold 20.g33 | 127426 | 144511 | C-A-P-A-C-A-P-C | NRPS | Unknown                          |

|              |                 |        |        |                          |          |                             |
|--------------|-----------------|--------|--------|--------------------------|----------|-----------------------------|
| Region 20.3  | Scaffold 20.g36 | 149182 | 151779 | C-A-P                    | NRPS     | Unknown                     |
| Region 69.1  | Scaffold 69.g5  | 1      | 42428  | A-P-Te                   | NRPS     | Ochrindole A (17%)          |
| Region 79.1  | Scaffold 79     | 1      | 43089  |                          | NRPS     | Unknown                     |
| Region 82.1  | Scaffold 82.g2  | 1      | 24294  | A-P-Te                   | NRPS     | Unknown                     |
| Region 93.3  | Scaffold 93.g10 | 27990  | 30535  | C-A                      | NRPS     | Unknown                     |
| Region 125.1 | Scaffold 125.g5 | 1      | 57332  | C-A-C                    | NRPS     | Unknown                     |
| Region 133.1 | Scaffold 133.g6 | 1      | 51306  | C-A                      | NRPS     | Unknown                     |
| Region 143.1 | Scaffold 143.g5 | 1      | 44723  | P-A                      | NRPS     | Unknown                     |
| Region 202.1 | Scaffold 202.g1 | 1      | 28192  | C-A-P-C                  | NRPS     | Tubulysin A (6%)            |
| Region 202.2 | Scaffold 202.g2 | 14421  | 17416  | A-P-C                    | NRPS     | Tubulysin A (6%)            |
| Region 42.1  | Scaffold 42     | 561    | 47863  |                          | PKS,NRPS | Unknown                     |
| Region 61.1  | Scaffold 61.g14 | 20743  | 65590  | KS-AT-MT-KR-ACP-C-A-P-Te | PKS,NRPS | Triticone DABFC (57%)       |
| Region 46.1  | Scaffold 46.g23 | 71887  | 115252 | KS-AT-PT-ACP-Te          | NR-PKS   | Viriditixin (55%)           |
| Region 75.1  | Scaffold 75.g27 | 56639  | 98993  | SAT-KS-AT-PT-ACP         | NR-PKS   | Cryptosporioptide BAC (26%) |
| Region 93.2  | Scaffold 93.g9  | 1579   | 50776  | KS-AT                    | NR-PKS   | Unknown                     |
| Region 206.1 | Scaffold 206.g1 | 1      | 27003  | KS-AT-DH                 | NR-PKS   | Pyripyropene A (33%)        |
| Region 133.2 | Scaffold 133.g7 | 1      | 51306  | KS-AT-DH-MT-KR-ACP       | PR-PKS   | Unknown                     |

|                      |              |                 |        |        |                       |                      |                         |
|----------------------|--------------|-----------------|--------|--------|-----------------------|----------------------|-------------------------|
| <i>Pl.fusiformis</i> | Region 1.1   | Scaffold 1.g23  | 77827  | 87337  | KS-AT-MT-ER-KR-ACP    | HR-PKS               | Unknown                 |
|                      | Region 1.2   | Scaffold1.g70   | 265444 | 310858 | KS-AT-MT-ER-KR-ACP    | HR-PKS               | Unknown                 |
|                      | Region 14.2  | Scaffold 14.g39 | 172672 | 214789 | KS-AT-DH-MT-ER-KR-ACP | HR-PKS               | LeucinostatinA B (10%)  |
|                      | Region 20.1  | Scaffold 20.g30 | 109233 | 171779 | KS-AT-DH-MT-ER-KR-ACP | HR-PKS               | Emericellamide AB (40%) |
|                      | Region 6.2   | Scaffold 6      | 326876 | 348294 |                       | Terpene              | Unknown                 |
|                      | Region 18.1  | Scaffold 18     | 170706 | 192013 |                       | Terpene              | Squalestatin S1 (40%)   |
|                      | Region 26.1  | Scaffold 26     | 75049  | 95531  |                       | Terpene              | Unknown                 |
|                      | Region 28.1  | Scaffold 28     | 117759 | 138919 |                       | Terpene              | Unknown                 |
|                      | Region 139.1 | Scaffold 139    | 20617  | 42485  |                       | Terpene              | Unknown                 |
|                      | Region 2.1   | Scaffold 2      | 232714 | 253931 |                       | Indole               | Unknown                 |
|                      | Region 39.1  | Scaffold 39     | 53070  | 117580 |                       | Indole,NRPS          | Sirodesmin PL (33%)     |
|                      | Region 6.1   | Scaffold 6      | 216958 | 277296 |                       | Fungal-RIPP-like     | Unknown                 |
|                      | Region 52.1  | Scaffold 52     | 1      | 38481  |                       | Fungal-RIPP-like     | Pyripyropene (33%)      |
|                      | Region 120.1 | Scaffold 120    | 8982   | 69323  |                       | Fungal-RIPP-like     | Unknown                 |
|                      | Region 121.1 | Scaffold 121    | 19846  | 70247  |                       | Fungal-RIPP-like     | Unknown                 |
|                      | Region 134.1 | Scaffold 134    | 1      | 62446  |                       | Fungal-RIPP-like,PKS | Ansaseomycin A B (13%)  |
|                      | Region 93.1  | Scaffold 93.g8  | 1579   | 50776  | Te                    | Other                | Fusaric acid (10%)      |
|                      | Region 5.1   | Scaffold 5.g64  | 411422 | 412973 | A-P-C                 | NRPS                 | Unknown                 |

|                |             |                  |         |         |                     |           |                                                                                      |
|----------------|-------------|------------------|---------|---------|---------------------|-----------|--------------------------------------------------------------------------------------|
| <i>mispora</i> | Region 5.2  | Scaffold 5.g65   | 414579  | 420793  | C-A                 | NRPS      | Unknown                                                                              |
|                | Region 6.2  | Scaffold 6.g17   | 129742  | 132588  | A-Te                | NRPS      | Unknown                                                                              |
|                | Region 6.8  | Scaffold 6.g210  | 1135446 | 1138952 | C-A                 | NRPS      | Unknown                                                                              |
|                | Region 7.1  | Scaffold 7       | 19894   | 64954   |                     | NRPS      | Unknown                                                                              |
|                | Region 12.1 | Scaffold 12      | 116619  | 170247  |                     | NRPS      | Unknown                                                                              |
|                | Region 16.2 | Scaffold 16.g53  | 335275  | 344607  | A-A-C-P-C-P-C       | NRPS      | Unknown                                                                              |
|                | Region 19.4 | Scaffold 19      | 341135  | 393626  |                     | NRPS      | Unknown                                                                              |
|                | Region 21.4 | Scaffold 21.g102 | 432651  | 435971  | A-P-T               | NRPS      | ε-poly-lysine (100%)                                                                 |
|                | Region 23.1 | Scaffold 23.g73  | 313835  | 315380  | A                   | NRPS      | Choline (100%)                                                                       |
|                | Region 26.1 | Scaffold 26.g51  | 222968  | 225892  | C-A                 | NRPS      | Cyclopiazonic acid (42%)                                                             |
|                | Region 28.1 | Scaffold 28.g5   | 65124   | 68767   | C-A-P               | NRPS      | Unknown                                                                              |
|                | Region 28.2 | Scaffold 28.g7   | 90349   | 93806   | C-A-P-C             | NRPS      | Unknown                                                                              |
|                | Region 4.2  | Scaffold 4       | 617474  | 659177  |                     | NRPS-like | Unknown                                                                              |
|                | Region 12.2 | Scaffold 12      | 497708  | 541193  |                     | NRPS-like | Unknown                                                                              |
|                | Region 46.1 | Scaffold 46      | 46633   | 87271   |                     | NRPS-like | Unknown                                                                              |
|                | Region 5.3  | Scaffold 5       | 1102121 | 1149442 |                     | PKS,NRPS  | Unknown                                                                              |
|                | Region 14.2 | Scaffold 14      | 634722  | 687260  |                     | PKS,NRPS  | Illicolin H (62%)                                                                    |
|                | Region 19.3 | Scaffold 19.g36  | 186594  | 192152  | KR-ACP-C-A-P-Te     | PKS,NRPS  | Unknown                                                                              |
|                | Region 32.1 | Scaffold 32.g2   | 45642   | 51144   | KR-ACP-C-A-Te       | PKS,NRPS  | Lucilactaene (69%)                                                                   |
|                | Region 2.3  | Scaffold 2       | 1393534 | 1442856 |                     | PKS,NRPS  | Ascochlorin (50%)                                                                    |
|                | Region 2.2  | Scaffold 2.g24   | 95089   | 97907   | KS-AT               | NR-PKS    | Unknown                                                                              |
|                | Region 16.1 | Scaffold 16.g49  | 315460  | 317847  | PT-ACP-Te           | NR-PKS    | YWA1 (100%)                                                                          |
|                | Region 19.2 | Scaffold 19.g35  | 180329  | 184881  | KS-AT-DH-MT         | NR-PKS    | Tolypyridone (100%)                                                                  |
|                | Region 21.3 | Scaffold 21.g67  | 308244  | 314240  | SAT-KS-AT-PT-ACP-Te | NR-PKS    | MonordenD/monocillinIV/ monocillin VII/ pochoninM/monocillin V/ monocillin II (100%) |

|             |                 |         |         |                           |                  |                                                                                      |    |
|-------------|-----------------|---------|---------|---------------------------|------------------|--------------------------------------------------------------------------------------|----|
| Region 4.3  | Scaffold 4.g306 | 1376326 | 1377484 | KR-ACP                    | PR-PKS           | Fusarin C (100%)                                                                     | I/ |
| Region 41.1 | Scaffold 41.g14 | 69586   | 77550   | KS-AT-DH-MT-KR            | PR-PKS           | BetaenoneC/probetaenone<br>stemphyloxin II (28%)                                     |    |
| Region 1.2  | Scaffold 1.g291 | 1336070 | 1337484 | ER-KR-ACP                 | HR-PKS           | Unknown                                                                              |    |
| Region 6.3  | Scaffold 6.g30  | 193373  | 195963  | ER-KR-ACP                 | HR-PKS           | AKML BDAC (100%)                                                                     |    |
| Region 6.5  | Scaffold 6.g82  | 420764  | 429084  | KS-AT-DH-MT-<br>ER-KR-ACP | HR-PKS           | Patulin (13%)                                                                        |    |
| Region 6.6  | Scaffold 6.g112 | 616842  | 624865  | KS-AT-MT-ER-KR-<br>ACP    | HR-PKS           | UNLL-YC2Q1O94PT (100%)                                                               |    |
| Region 6.7  | Scaffold 6.g209 | 1125184 | 1133414 | KS-AT-DH-MT-<br>ER-KR-ACP | HR-PKS           | Unknown                                                                              |    |
| Region 7.2  | Scaffold 7.g260 | 1109730 | 1116832 | KS-AT-ER-KR-<br>ACP       | HR-PKS           | Scytophycin (11%)                                                                    |    |
| Region 14.1 | Scaffold 14.g79 | 310982  | 314433  | ER-KR-ACP                 | HR-PKS           | Unknown                                                                              |    |
| Region 21.2 | Scaffold 21.g63 | 290083  | 297343  | KS-AT-DH-ER-<br>KR-ACP    | HR-PKS           | Monorden Dmonocillin IVmonocillin<br>VIIpochonin Mmonocillin VmonocillinII<br>(100%) |    |
| Region 68.1 | Scaffold 68.g2  | 9458    | 17032   | KS-AT-ER-KR-<br>ACP       | HR-PKS           | 4-epi-15-epi-brefeldin A (40%)                                                       |    |
| Region 1.3  | Scaffold 1      | 1818360 | 1839982 |                           | Terpene          | Unknown                                                                              |    |
| Region 8.1  | Scaffold 8      | 616055  | 637080  |                           | Terpene          | Squalestatin S1 (40%)                                                                |    |
| Region 11.1 | Scaffold 11     | 333198  | 354607  |                           | Terpene          | Mangicol A (33%)                                                                     |    |
| Region 21.1 | Scaffold 21     | 169963  | 191672  |                           | Terpene          | Unknown                                                                              |    |
| Region 48.1 | Scaffold 48     | 61502   | 82497   |                           | Terpene          | Unknown                                                                              |    |
| Region 19.1 | Scaffold 19     | 26728   | 98386   |                           | NRPS,indole      | Ergotamine (64%)                                                                     |    |
| Region 4.1  | Scaffold 4      | 470667  | 530852  |                           | Fungal-RIPP-like | Unknown                                                                              |    |

|             |                 |        |        |           |                  |                    |
|-------------|-----------------|--------|--------|-----------|------------------|--------------------|
| Region 6.4  | Scaffold 6      | 266954 | 327797 |           | Fungal-RIPP-like | Unknown            |
| Region 15.1 | Scaffold 15     | 202891 | 263124 |           | Fungal-RIPP-like | Unknown            |
| Region 1.1  | Scaffold 1.g72  | 295273 | 298611 | A-NOX-FNR | NRPS,Other       | Unknown            |
| Region 2.1  | Scaffold 2.g23  | 90729  | 91739  | P-Te      | Other            | Unknown            |
| Region 6.1  | Scaffold 6.g13  | 102660 | 105414 | Caic-P-Te | Other            | Unknown            |
| Region 22.1 | Scaffold 22.g66 | 317437 | 318249 | Te        | Other            | Oxaleimide C (10%) |
| Region 24.1 | Scaffold 24.g97 | 444447 | 445421 | P         | Other            | Unknown            |

**Table S3.** Overview of biosynthetic gene clusters in the genomes of the two studied fungi.

|                             | No of cluster | NRPS | PKS | NR-PKS | PR-PKS | HR-PKS | PKS, NRPS | Terpene | NRPS, Other | PKS, Other | Other |
|-----------------------------|---------------|------|-----|--------|--------|--------|-----------|---------|-------------|------------|-------|
| <i>Pe. elaphomyceticola</i> | 39            | 15   | 9   | 4      | 1      | 4      | 2         | 5       | 1           | 1          | 6     |
| <i>Pl. fusiformispora</i>   | 50            | 16   | 15  | 3      | 2      | 10     | 5         | 5       | 2           |            | 7     |

**Table S4.** Morphological comparison of asexual morph species of *Pleurocordyceps*.

| Species            | Host                                            | Synnemata (mm)                                                                                                                                   | Phialides (μm)                                                                                                                                                                                   | Conidia (μm)                                                                                                                  | References |
|--------------------|-------------------------------------------------|--------------------------------------------------------------------------------------------------------------------------------------------------|--------------------------------------------------------------------------------------------------------------------------------------------------------------------------------------------------|-------------------------------------------------------------------------------------------------------------------------------|------------|
| <i>Pl. agarica</i> | <i>Ophiocordyceps</i> sp. or melolonthid larvae | Solitary, unbranched, agaricshaped, size (0.34–1.2×0.11–0.42); conidial mass pileus-like, light yellow to pale brown, size (0.08–0.25×0.36–0.99) | α-phialides lanceolate, length (30.7–81.9), base width (1.3–2.4), neck width (0.5–1.1); β-phialides narrowly lageniform or subulate, length (4.9–28.6), base width (1.8–3), neck width (0.4–0.8) | α-conidia globose to subglobose, size (2–3.1×1.8–2.9); β-conidia fusiform, catenate or clump together, size (3.8–6.8×1.7–3.2) | [25]       |
|                    | Coleoptera larvae or <i>O. barnesii</i>         | Emerging after 30 days, solitary or not solitary, branched or unbranched,                                                                        | α-phialides, narrowly lageniform, 9.9–14.3 × 0.7–1.4. β-phialides, lanceolate or narrowly lageniform, 22.9–64.2 × 1–1.5                                                                          | α-conidia, globose to subglobose, 1.8–2.2 × 1.4–1.9. β-conidia, fusiform, 3.2–3.9 × 1.4–1.8                                   |            |

|                             |                                                      |                                                                                                                                                                                                                                                                                                |                                                                                                                                                                                                                                                                                         |                                                                                                                                                                          |         |
|-----------------------------|------------------------------------------------------|------------------------------------------------------------------------------------------------------------------------------------------------------------------------------------------------------------------------------------------------------------------------------------------------|-----------------------------------------------------------------------------------------------------------------------------------------------------------------------------------------------------------------------------------------------------------------------------------------|--------------------------------------------------------------------------------------------------------------------------------------------------------------------------|---------|
| <i>Pl. lanceolatus</i>      | Lepidoptera larvae                                   | 1.3–2.2 long, showing 1–2 radiating ringlike distributions<br>0.2–1.2 cm long, 1–3 mm wide, lanceolate to corniform, solitary to crowded, stipitate, usually unbranched, rarely branched on the PDA, yellow to yellowish on the fresh specimen, covered with conidial masses, white on the PDA | $\alpha$ -phialides 12–18 $\times$ 1.3–1.6, directly from hyphae, solitary, usually unbranched, subulate, at the base, 8–14 long, tapering into a long neck, 2–4 long; $\beta$ -phialides 20.2–28.9 $\times$ 1.6–2.5, branched into 2 or 3 phialides, narrowly lageniform to lanceolate | $\alpha$ -conidia 1.8–2.5, spherical, forming slimy conidial masses along the synnema; $\beta$ -conidia 3–4.4 $\times$ 1.4–2.4, fusiform                                 | [1]     |
| <i>Pl. marginaliradians</i> | Cossidae larva                                       | Emerging after 14 days, single or branched into 2 or 3 branched, 3.2–4.6 long, showing 1–2 radiating ringlike distributions                                                                                                                                                                    | $\alpha$ -phialides, elongate lageniform, 11–14.4 $\times$ 1.2–1.8; $\beta$ -phialides, 12.8–23.9 $\times$ 1.8–2.7, narrow slender to narrow lageniform                                                                                                                                 | $\alpha$ -conidia 1.9–2.6 $\mu$ m diam, globose, catenate, one-celled, pale yellow slimy in mass. $\beta$ -conidia 3.1–3.9 $\times$ 1.6–2.1 $\mu$ m fusiform, one-celled | [42]    |
| <i>Pl. parvicapitata</i>    | <i>Perennicordyceps elaphomyceticola</i>             | Absent                                                                                                                                                                                                                                                                                         | Phialides 11.7–16.3 $\times$ 1.1–1.6, cylindrical at the base, 8–12 $\mu$ m long, tapering into a long neck, 1–3.5 $\mu$ m long                                                                                                                                                         | globose to subglobose, 2.8–3.6 $\times$ 2.4–3                                                                                                                            | [1]     |
| <i>Pl. sinensis</i>         | Lepidoptera larvae or <i>Ophiocordyceps sinensis</i> | Solitary, crowded, branched or unbranched, a length of up to 50–60 in culture, conidial mass yellow or yellow-orange                                                                                                                                                                           | Lanceolate or narrowly lageniform, length (12.5–66), base width (1.4–3.5), neck width (0.6–1.8)                                                                                                                                                                                         | $\alpha$ -conidia, ovoid, 1.7–2.6 $\times$ 1.3–2; $\beta$ -conidia, fusiform, 3.3–4.5 $\times$ 1.3–2                                                                     | [32,60] |



|                            |                                                  |                                                                                                                                              |                                                                                                                                                                                                                                                                                                                                                                                                                                                          |                                                                                                                                                                      |      |
|----------------------------|--------------------------------------------------|----------------------------------------------------------------------------------------------------------------------------------------------|----------------------------------------------------------------------------------------------------------------------------------------------------------------------------------------------------------------------------------------------------------------------------------------------------------------------------------------------------------------------------------------------------------------------------------------------------------|----------------------------------------------------------------------------------------------------------------------------------------------------------------------|------|
| <i>Pl. vitellina</i>       | <i>Ophiocordyceps nigrella</i>                   | Absent                                                                                                                                       | $\alpha$ -phialides 12–37.7×1.5–2.7, hyaline, smooth, elongated lageniform, crowded, gathered in the middle of colony. $\beta$ -phialides 11.6–28.7×1.9–3.1, hyaline, smooth, directly growing from hyphae, with or without metula at the base, solitary, lanceolate, ovate at the base, tapering into a short neck                                                                                                                                      | $\alpha$ -conidia spherical, 2.5–3.2, one-celled, smooth-walled. $\beta$ -conidia fusiform, 3.1–4.5×1.4–2.4, catenulate                                              | [1]  |
| <i>Pl. yunnanensis</i>     | Hemiptera adults or <i>Ophiocordyceps nutans</i> | Solitary, caespitose or crowded, branched or unbranched, size (0.7–14×0.05–1.2); conidial mass white to yellow-brown, size (0.2–1.5×0.2–1.4) | $\alpha$ -phialides cylindrical to subulate, length (20.1–57.8), base width (1–2.3), neck width (0.5–1.3); $\beta$ -phialides narrowly lageniform or subulate, length (7.1–30.6), base width (2.3–3.7), neck width (0.5–1.1)                                                                                                                                                                                                                             | $\alpha$ -conidia subglobose, ellipsoidal, size (1.4–2.5×1.2–2.2); $\beta$ -conidia fusiform, catenate or clump together, size (2.8–5.7×1.1–2.7)                     | [24] |
| <i>Pl. nutans</i>          | <i>Ophiocordyceps nutans</i>                     | 2–5 mm long, 0.1–0.4 mm wide, cylindrical, clavate, capitate, stipitate, crowded, simple, white to yellowish                                 | Two types, both of the types observed on the same synnema. $\alpha$ -phialides 10–24×1–1.2, gathered at the apex of the synnema, arranged in a parallel palisade-like layer around the apex of the fertile head, hyaline, usually branched into 2–6 phialides, narrowly slender lanceolate; $\beta$ -phialides 10–14×1.1–1.8, solitary, scattered along the stipe, lanceolate, ovate at the base, 5–12 $\mu$ m long, tapering into a long neck, 2–4 long | $\alpha$ -conidia 1.6–2.3, spherical, forming slimy conidial masses on the fertile head; $\beta$ -conidia 3.5–5×1.3–2, fusiform, produced along stipe of the synnema | [1]  |
| <i>Pl. heilongtanensis</i> | <i>Ophiocordyceps</i> sp.                        | 3–10 long, 0.5–2 wide, scattered on the surface of host, cylindrical, stipitate, unbranched, white, with or without fertile head             | $\alpha$ -phialides 6.8–25.3×1.2–2.8, hyaline, smooth, elongated lageniform, caespitose, palisade-like, crowded, gathered in the top of synnema, mostly branched into 2–4 phialides. $\beta$ -phialides 9.6–19.5×1.2–3.1, hyaline, smooth, solitary, branched into 2 or 3 phialides, with or without metula at the base, directly growing from hyphae                                                                                                    | $\alpha$ -conidia 2.3–3.1×1.3–1.9, subglobose to ovoid, in yellowish slimy mass. $\beta$ -conidia 2.8–4.4×1.4–2.6 fusiform, one-celled                               | [1]  |

|                           |                                                     |                                                                                        |                                                                                                                                                                                                                                                                                                                                                                                                           |                                                                                                                                                                                                                                                                                       |            |
|---------------------------|-----------------------------------------------------|----------------------------------------------------------------------------------------|-----------------------------------------------------------------------------------------------------------------------------------------------------------------------------------------------------------------------------------------------------------------------------------------------------------------------------------------------------------------------------------------------------------|---------------------------------------------------------------------------------------------------------------------------------------------------------------------------------------------------------------------------------------------------------------------------------------|------------|
| <i>Pl. lianzhouensis</i>  | Lepidoptera larva or <i>Ophiocordyceps crinalis</i> | Unbranched or dichotomously branched, 10–20 tall, 0.5–1.5 wide, conidial mass not seen | In whorls or intercalary and terminal, terminally awlshaped, length (6–12), base width (1.3–1.7), neck width (0.5–0.8)                                                                                                                                                                                                                                                                                    | Ellipsoidal, oblong to cylindrical, size (5–7×1.3–1.6)                                                                                                                                                                                                                                | [59]       |
| <i>Pl. fusiformispora</i> | Lepidoptera larva or <i>Ophiocordyceps</i> sp.      | Flaky, branched, 14–19 long, and 3–5 wide, showing radiating distributions.            | $\alpha$ -phialides acropleurogenous on conidiophores, and solitary on hyphae; narrow lageniform or subulate, tapering abruptly from the base to the apex, 8.42–20.9 long, 1.3–2.9 wide at the base, and 0.6–1.6 wide at the apex. $\beta$ -phialides solitary on hyphae, lanceolate, tapering gradually from the base to the apex, 8.7–14.8 long, 2.5–3.1 wide at the base, and 0.9–1.1 wide at the apex | $\alpha$ -conidia ovoid or elliptic, and occurring in the conidial mass on the agar or on the final portion of synnema, 2.9–4.8×1.3–3.1; $\beta$ -conidia fusiform or long fusiform, and produced on the surface mycelium of colony, usually in chains on a phialide, 2.8–4.4×1.7–2.8 | This study |

---
